# Supplementary material for: Interlock Formation and Coiling of Meiotic Chromosome Axes During Synapsis
Source: Oxford University Press journal article supplement (doi:10.1534/genetics.109.108688), 2009-09-15
Supplement: figures2.pdf [file figures2.pdf]

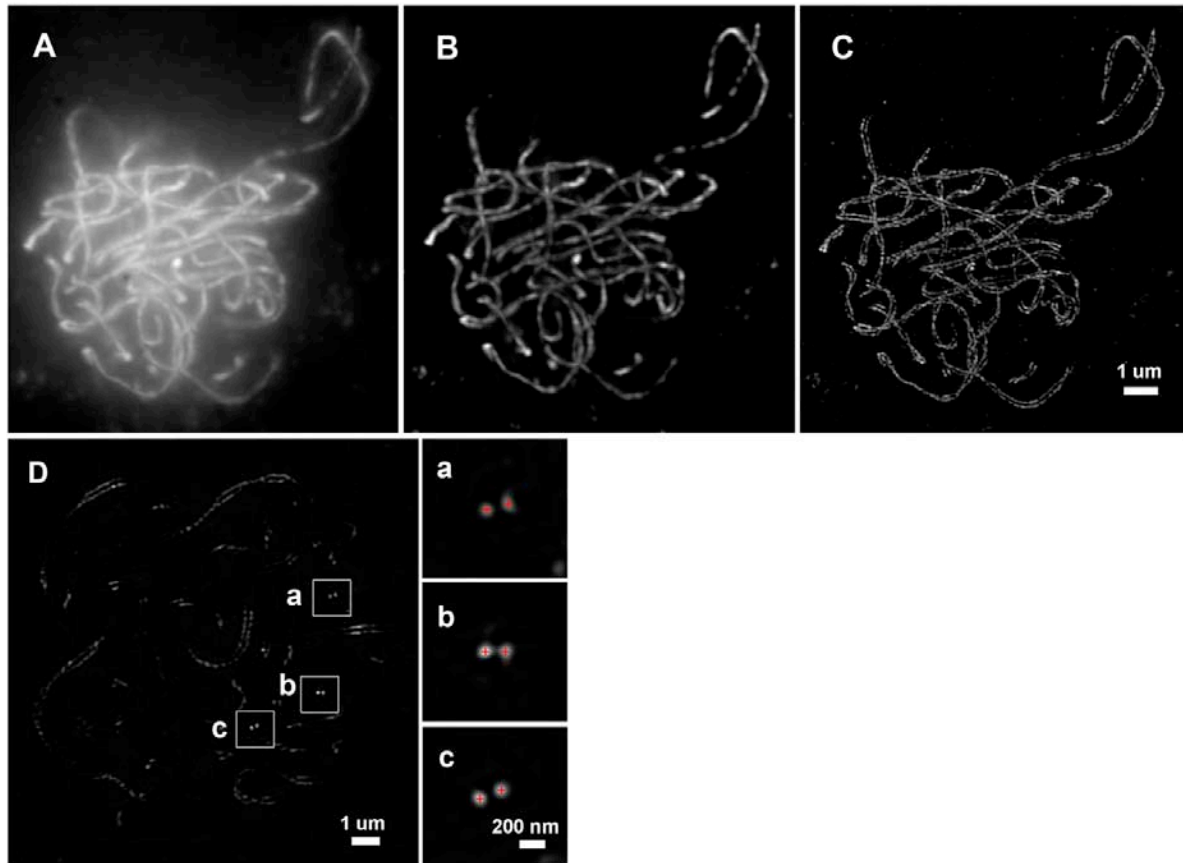

FIGURE S2. — Comparison of lateral element morphology under different microscopy methods. (A) A phase-averaged (equivalent to conventional widefield) partial projection of lateral elements detected with AFD1 immunostaining. (B) The same nucleus after applying constrained iterative deconvolution. (C) The same nucleus under 3D-SIM. The higher resolution of 3D-SIM is demonstrated by the discrimination of both lateral elements in (C) whereas A and B show only single fibers. (D) A cross section of a pachytene nucleus stained with AFD1 antibody. Three insets in (D) as shown in (a), (b) and (c) are three examples for the measurement of the space between AFD1 signals of synaptonemal complex.
