# Supplementary material for: Interlock Formation and Coiling of Meiotic Chromosome Axes During Synapsis
Source: Oxford University Press journal article supplement (doi:10.1534/genetics.109.108688), 2009-09-15
Supplement: figures3.pdf [file figures3.pdf]

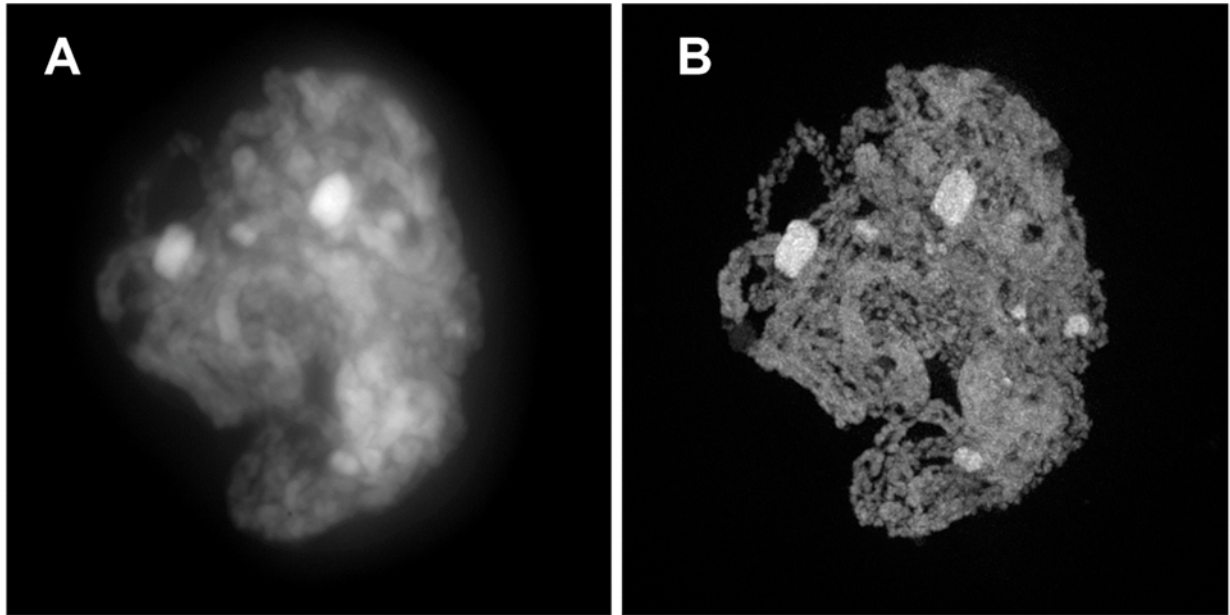

FIGURE S3. — Increased resolution of chromatin structure under 3D-SIM. (A) A full projection of a late zygotene/early pachytene nucleus under conventional fluorescence microscopy. (B) The same nucleus under 3D-SIM. The distinguishing features of B are that homologs can be distinguished, chromomeres are more visible, and substructure of chromomeres can be seen.
