# Supplementary material for: Interlock Formation and Coiling of Meiotic Chromosome Axes During Synapsis
Source: Oxford University Press journal article supplement (doi:10.1534/genetics.109.108688), 2009-09-15
Supplement: figures4.pdf [file figures4.pdf]

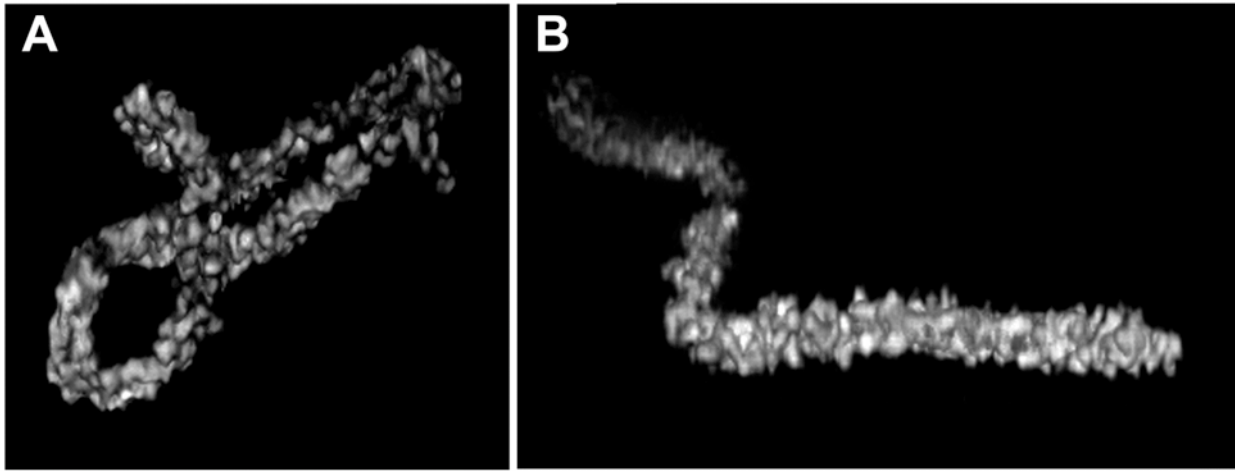

FIGURE S4. — Volume-rendered projections of chromosome 10 at early and late pachytene. A and B show the entire chromosomes whose long arms are depicted in Figures 2F and 2G, respectively. The volume-rendered projection shows the complexity of the surface and strengthens the impression that late pachytene chromosome structure is a result of the compression of early pachytene structure along the chromosome axis.
