# Supplementary material for: Interlock Formation and Coiling of Meiotic Chromosome Axes During Synapsis
Source: Oxford University Press journal article supplement (doi:10.1534/genetics.109.108688), 2009-09-15
Supplement: tables1.pdf [file tables1.pdf]

**TABLE S1**

**Measurement of total chromosome lengths, unsynapsed regions (US), numbers of 180 degree coils and average distance between coils of three late zygotene nuclei and three late pachytene nuclei**

| Samples                                  | Total length of chromosomes (um) | US/total length | Numbers of 180 degree coils | Distance between coils (um) |
|------------------------------------------|----------------------------------|-----------------|-----------------------------|-----------------------------|
| late-zygotene cell 1                     | 868                              | 9.1%            | 242                         | 3.26±1.85                   |
| late-zygotene cell 2                     | 689                              | 6.1%            | 240                         | 2.70±1.18                   |
| late-zygotene cell 3                     | 632                              | 2.3%            | 290                         | 2.13±1.11                   |
| <b>Average for late-zygotene nuclei</b>  | <b>729.6</b>                     | <b>5.8%</b>     | <b>257.3</b>                | <b>2.66±1.48</b>            |
| late-pachytene cell 1                    | 434                              | 0%              | 335                         | 1.29±0.34                   |
| late-pachytene cell 2                    | 421                              | 0%              | 315                         | 1.33±0.45                   |
| late-pachytene cell 3                    | 472                              | 0%              | 340                         | 1.38±0.48                   |
| <b>Average for late pachytene nuclei</b> | <b>442.3</b>                     | <b>0%</b>       | <b>330</b>                  | <b>1.34±0.43</b>            |
