# Supplementary material for: Interlock Formation and Coiling of Meiotic Chromosome Axes During Synapsis
Source: Oxford University Press journal article supplement (doi:10.1534/genetics.109.108688), 2009-09-15
Supplement: tables2.pdf [file tables2.pdf]

**TABLE S2****Lengths and ratios of unsynapsed axes**

|                                                   | Lengths of unsynapsed regions (um/um) | Ratio             |
|---------------------------------------------------|---------------------------------------|-------------------|
|                                                   | 14.7/13.1                             | 1.12              |
|                                                   | 13.3/10.6                             | 1.25              |
|                                                   | 7.1/5.5                               | 1.29              |
|                                                   | 3.9/2.1                               | 1.86              |
| Unsynapsed regions associated with interlocks     | 3.8/2.7                               | 1.41              |
|                                                   | 4.3/3.8                               | 1.13              |
|                                                   | 3.3/2.3                               | 1.43              |
|                                                   | 7.0/6.6                               | 1.06              |
|                                                   | 5.1/3.1                               | 1.65              |
|                                                   | 11.6/9.4                              | 1.23              |
|                                                   | 5.3/2.5                               | 2.12              |
| <b>Average ratio</b>                              |                                       | <b>1.41±0.33</b>  |
|                                                   | 7.0/6.7                               | 1.04              |
| Unsynapsed regions not associated with interlocks | 11.1/10.7                             | 1.04              |
|                                                   | 2.5/2.4                               | 1.04              |
| <b>Average ratio</b>                              |                                       | <b>1.04±0.003</b> |
